# Supplementary material for: A novel cathode architecture using Cu nanoneedle arrays as the cathode support for AAEMFC application
Source: Royal Society of Chemistry journal article supplement (doi:10.1039/c7ta02437a), 2017-01-01
Supplement: c7ta02437a1.pdf [file c7ta02437a1.pdf]

## Supporting Information

### A Novel Cathode Architecture Using Cu Nanoneedle arrays as Cathode Support for AAEMFC Application

Jia Jia<sup>a,b</sup>, Hongmei Yu<sup>a,\*</sup>, Xueqiang Gao<sup>a,b</sup>, Jun Chi<sup>a,b</sup>, Bowen Qin<sup>a,b</sup>, Wei Song<sup>a</sup>, Zhigang Shao<sup>a,\*</sup> and Bao lian Yi<sup>a</sup>

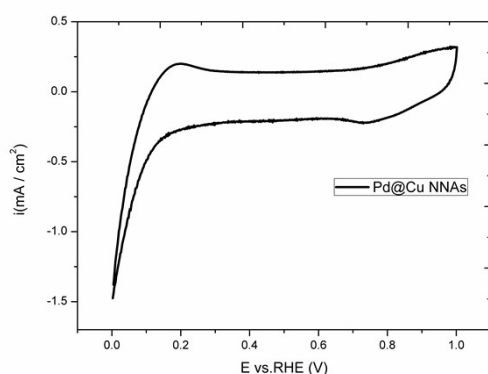

Fig. S1 CV trace of the Pd/Cu NNAs electrode.

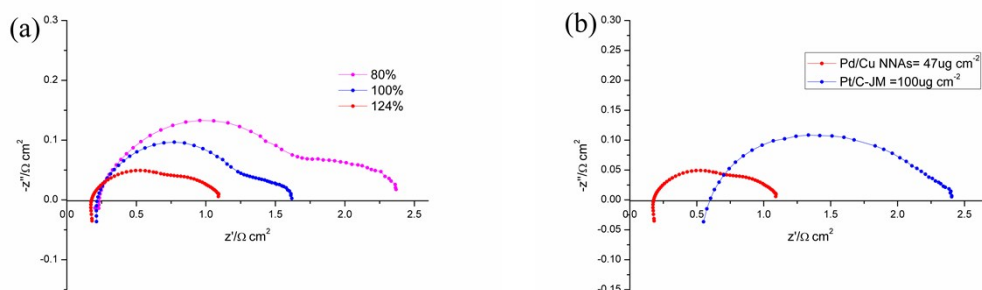

Fig. S2 (a) EIS comparison of Pd/Cu NNAs with different cathode inlet gas humidity, (b) EIS comparison of Pd/Cu NNAs with commercial Johnson Matthey 70% Pt/C catalyst (Pt loading of 100  $\mu\text{g}/\text{cm}^2$ ).
